# Supplementary material
Source: MDPI journal article supplement (https://www.mdpi.com/1999-4907/15/5/827)
Supplement: s1 [file s1]

**Supplementary Material. Figure S1. Comparison of raw growth trajectories (dotted lines) and site index curves (solid lines) for *Quercus pyrenaica* fitted using models M2 and M6. Curves are forced to pass at a reference age of 20 years through heights 3, 6, 9 and 12 m**

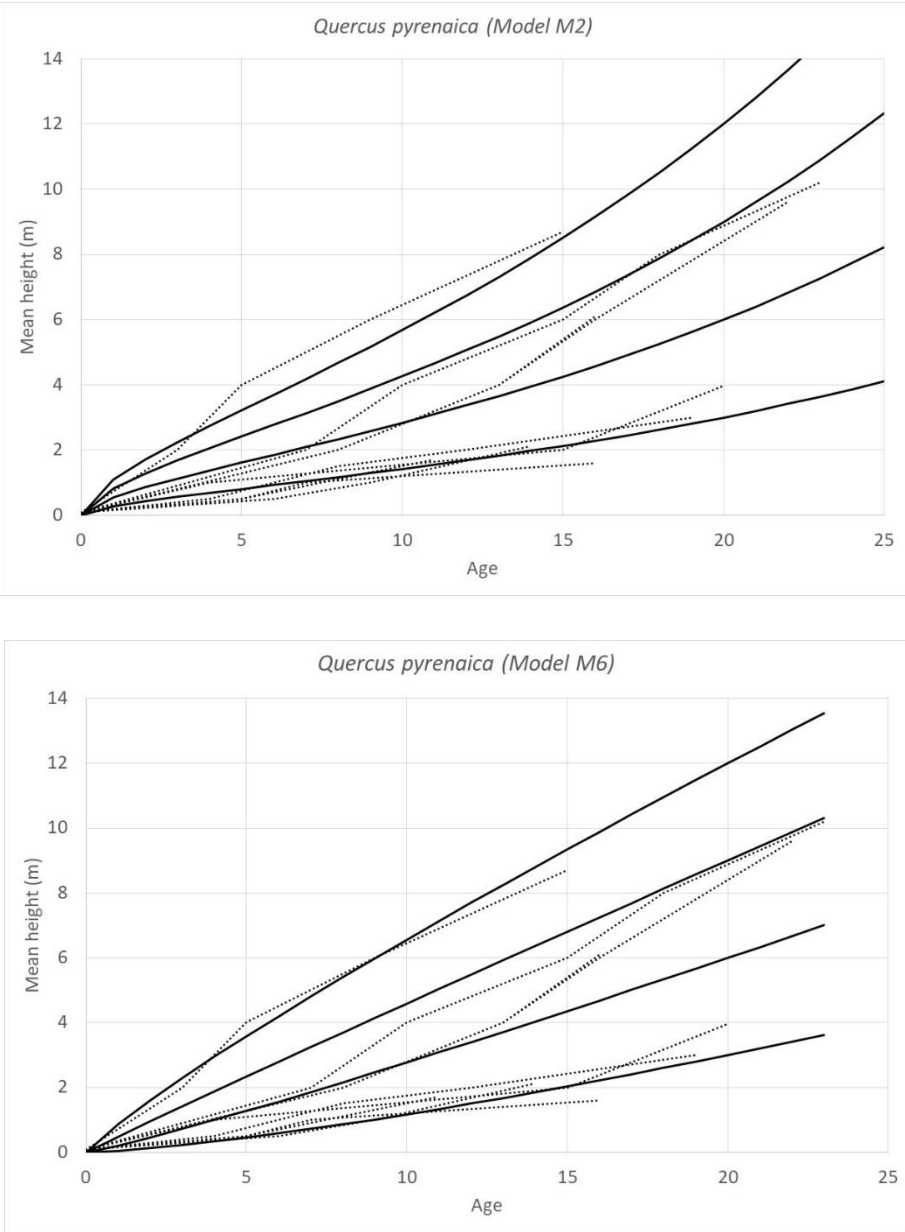

**Supplementary Material. Table S1.** Parameter estimates and goodness of fit statistics for the biomass model dependent on root collar diameter and height  $AGB = \beta_0 \cdot (RCD^2 H)^{\beta_1} + \varepsilon'''$  for species studied

| Species              | Parameters       | RMSE    | $R^2_{adj}$ |
|----------------------|------------------|---------|-------------|
| <i>P. halepensis</i> | $\beta_0$ 0.3061 | 7.5973  | 0.8616      |
|                      | $\beta_1$ 0.6536 |         |             |
| <i>P. nigra</i>      | $\beta_0$ 0.0987 | 10.5774 | 0.7897      |
|                      | $\beta_1$ 0.8121 |         |             |

|                         |           |        |         |        |
|-------------------------|-----------|--------|---------|--------|
| <i>P. pinaster</i>      | $\beta_0$ | 0.0843 | 10.3618 | 0.8840 |
|                         | $\beta_1$ | 0.8021 |         |        |
| <i>P. pinea</i>         | $\beta_0$ | 0.1417 | 7.9859  | 0.9371 |
|                         | $\beta_1$ | 0.7757 |         |        |
| <i>P. radiata</i>       | $\beta_0$ | 0.1355 | 11.2528 | 0.9079 |
|                         | $\beta_1$ | 0.7473 |         |        |
| <i>P. sylvestris</i>    | $\beta_0$ | 0.0913 | 3.6985  | 0.9032 |
|                         | $\beta_1$ | 0.7857 |         |        |
| <i>Q. faginea</i>       | $\beta_0$ | 0.2046 | 4.0640  | 0.8665 |
|                         | $\beta_1$ | 0.7076 |         |        |
| <i>Q. ilex</i>          | $\beta_0$ | 0.0953 | 10.2007 | 0.7862 |
|                         | $\beta_1$ | 0.9023 |         |        |
| <i>Q. pyrenaica</i>     | $\beta_0$ | 0.0614 | 0.1970  | 0.9897 |
|                         | $\beta_1$ | 0.8182 |         |        |
| <i>Q. robur+petraea</i> | $\beta_0$ | 0.0541 | 6.2047  | 0.8544 |
|                         | $\beta_1$ | 0.8361 |         |        |
| <i>Q. suber</i>         | $\beta_0$ | 0.0300 | 12.8420 | 0.8476 |
|                         | $\beta_1$ | 0.9648 |         |        |

*AGB* aboveground biomass (kg); *RCD* root-collar-diameter (cm); *H* total tree height (m);  $\beta_0$  and  $\beta_1$  are the fitted parameters of the model; RMSE root mean square error;  $R^2_{\text{adj}}$  is the adjusted coefficient of determination.
